# Supplementary material
Source: PubMed Central journal article supplement (PMC3080040)
Supplement: NIHMS261991-supplement-Supp1.pdf [file NIHMS261991-supplement-Supp1.pdf]

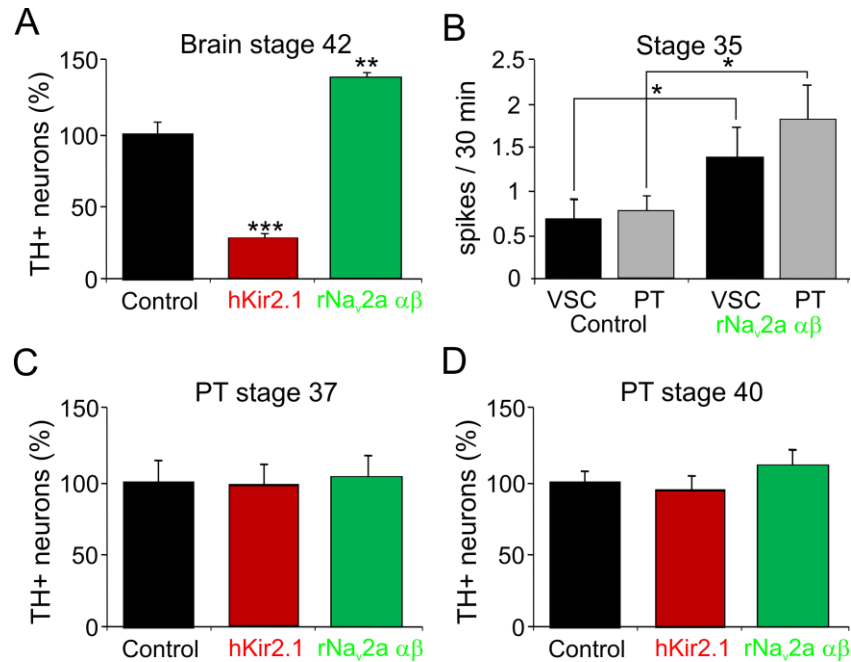

**Supplementary Figure 1. Activity-dependent dopamine specification is absent from the PT at earlier stages of development.** **A.** Percent change in TH-IR neurons in activity-manipulated embryos compared to control in the brain, adding OB, DLSC, VSC and PT together. **B.** Overexpression of Na<sub>v</sub> increases spike frequency to a similar level in the PT and VSC. Stage 35. **C-D.** Percent change in TH-IR neurons in activity-manipulated embryos compared to control in PT at stage 37 (**C**), or in stage 40 (**D**) (n>4 larvae per stage; values are mean ± SEM. \*p>0.05; comparing control versus hKir2.1 and rNa<sub>v</sub>2a αβ by the Kruskal-Wallis test followed by Conover post-hoc analysis).

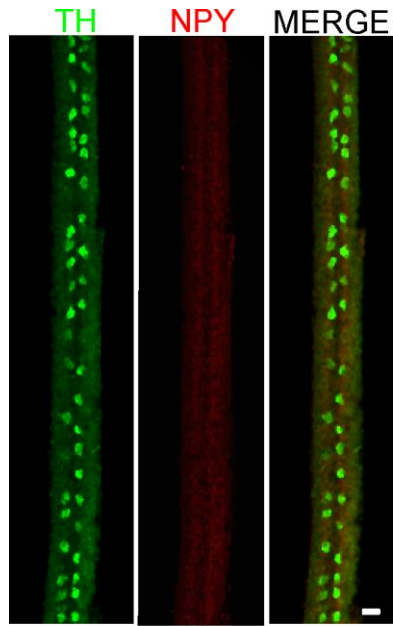

**Supplementary Figure 2. NPY expression in the spinal cord.** NPY is not expressed in dopaminergic cells of the spinal cord. Scale bar is 25  $\mu\text{m}$ . Wholemount from a stage 42 larva.

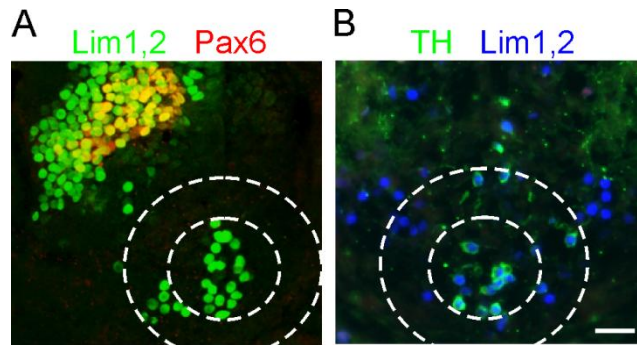

**Supplementary Figure 3. Lim1,2 and Pax6 expression in the VSC. A.** Transcription factors Lim1,2 and Pax6 are expressed in the diencephalon but Pax6 is not expressed in the VSC (dashed circles). **B.** TH neurons of the VSC core and annulus express Lim1,2, as previously shown (Dulcis and Spitzer, 2008). Scale bar is 40  $\mu$ m. Transverse sections are from stage 42 larvae.
